# Supplementary material for: Can Biomarkers and PET Imaging Predict Abdominal Aortic Aneurysm Growth Rate?
Source: MDPI journal article supplement (doi:10.3390/jcm13082448), 2024-04-22
Supplement: s1 [file s1]

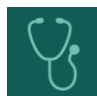

## Supplementary Materials

**Table S1.** Clinical characteristics of 164 AAA patients according to PET results at inclusion. Analysis was done with Student t-test or Fisher exact test.

|                   | All (n=164)            | PET- (n=136)          | PET+ (n=28)          | P-value           |
|-------------------|------------------------|-----------------------|----------------------|-------------------|
| Age (years)       | 71.9 ± 8.21            | 71.8 ± 8.13           | 72.5 ± 8.68          | 0.69              |
| Sex (Male/Female) | 147 (89.6) / 17 (10.4) | 125 (91.9) / 11 (8.1) | 22 (78.6) / 6 (21.4) | <b>0.046</b>      |
| AAA diameter      | 51.6 ± 12.2            | 51.1 ± 12.2           | 54.3 ± 12.0          | 0.20              |
| * SUVr            | 0.79 ± 0.19            | 0.74 ± 0.15           | 1.02 ± 0.21          | <b>&lt;0.0001</b> |
| Smoking           |                        |                       |                      | 0.92              |
| Never             | 20 (12.2)              | 17 (12.5)             | 3 (10.7)             |                   |
| Former            | 79 (48.2)              | 66 (48.5)             | 13 (46.4)            |                   |
| Current           | 65 (39.6)              | 53 (39.0)             | 12 (42.9)            |                   |
| Diabetes          | 25 (15.2)              | 22 (16.2)             | 3 (10.7)             | 0.57              |
| Hypertension      | 105 (64.0)             | 86 (63.2)             | 19 (67.9)            | 0.83              |
| COPD              | 61 (37.2)              | 51 (37.5)             | 10 (35.7)            | 1.00              |
| RI                | 23 (14.0)              | 20 (14.7)             | 3 (10.7)             | 0.77              |
| Stroke            | 26 (15.9)              | 20 (14.7)             | 6 (21.4)             | 0.40              |
| HLD               | 101 (61.6)             | 87 (64.0)             | 14 (50.0)            | 0.20              |
| AMI               | 52 (31.7)              | 44 (32.4)             | 8 (28.6)             | 0.82              |
| PAD               | 52 (31.7)              | 41 (30.1)             | 11 (39.3)            | 0.38              |
| Angina pectoris   | 25 (15.2)              | 22 (16.2)             | 3 (10.7)             | 0.57              |
| Aspirin           | 94 (57.3)              | 79 (58.1)             | 15 (53.6)            | 0.68              |
| Statins           | 105 (64.4)             | 88 (65.2)             | 17 (60.7)            | 0.67              |
| Betablockers      | 49 (30.1)              | 42 (31.1)             | 7 (25.0)             | 0.65              |
| **Cancer          | 22 (13.4)              | 18 (13.2)             | 4 (14.3)             | 1.00              |

\* SUVr was log-transformed. \*\* concomitant or history of cancer. COPD: chronic obstructive pulmonary disease; RI: renal insufficiency; HLD: hyperlipidemia; AMI: acute myocardial infarction; PAD: peripheral artery disease.

**Table S2.** Relationship between AAA diameter at PET1 and rapid growth as derived by logistic regression analysis (N=121 AAA patients).

| AAA diameter at PET1 | Without rapid growth (n=85) | With rapid growth (n=36) | OR   | IC 95%    | P-value |
|----------------------|-----------------------------|--------------------------|------|-----------|---------|
| < 45 mm              | 31 (36.5)                   | 7 (19.4)                 | 1.00 |           | 0.040   |
| 45 – 50 mm           | 27 (31.8)                   | 11 (30.6)                | 1.80 | 0.61-5.31 |         |
| 50 – 55 mm           | 17 (20.0)                   | 6 (16.7)                 | 1.56 | 0.45-5.40 |         |
| ≥ 55 mm              | 10 (11.8)                   | 12 (33.3)                | 5.31 | 1.64-17.2 |         |
